# Supplementary material for: Ribosome Biogenesis Serves as a Therapeutic Target for Treating Endometriosis and the Associated Complications
Source: MDPI journal article supplement (doi:10.3390/biomedicines10010185), 2022-01-17
Supplement: s1 [file s1]

**Table S1.** Information for antibodies used in this study

| <b>Antibodies for flow cytometry</b>  |                         |                                |                 |              |                 |
|---------------------------------------|-------------------------|--------------------------------|-----------------|--------------|-----------------|
| <i>Marker</i>                         | <i>Conjugate</i>        | <i>Cell type</i>               | <i>Dilution</i> | <i>Brand</i> | <i>Cat. No.</i> |
| CD3                                   | PE/Dazzle™<br>(594nm)   | T-cell                         | 1/80            | BioLegend    | 100347          |
| F4/80                                 | PECy7 (561nm)           | Macrophage<br>(LpM)            | 1/200           | BioLegend    | 123114          |
| Ly6C                                  | PE (488nm)              | Monocyte                       | 1/400           | BD           | 560592          |
| MHCII                                 | APC-Cy7<br>(633nm)      | Macrophage<br>(SpM)            | 1/400           | BioLegend    | 107627          |
| Ly6G                                  | PE-Texas Red<br>(561nm) | Neutrophil                     | 1/200           | BD           | 562700          |
| CD45.2                                | PerCP-Cy5.5<br>(488nm)  | Lymphocyte                     | 1/200           | BioLegend    | 109827          |
| CD3                                   | APC (633nm)             | T cell                         | 1/200           | BioLegend    | 100236          |
| CD19                                  | APC (633nm)             | B cell                         | 1/200           | BioLegend    | 152410          |
| CD49b                                 | APC (633nm)             | NK cell                        | 1/200           | BD           | 560628          |
| Siglec F                              | APC (633nm)             | Eosinophil                     | 1/200           | Miltenyi     | 130-102-241     |
| FVS660                                | APC (633nm)             | Dead cell                      | 1/1000          | BD           | 564405          |
| <b>Antibodies for IHC study</b>       |                         |                                |                 |              |                 |
| <i>Marker</i>                         | <i>Conjugate</i>        | <i>Ab type</i>                 | <i>Dilution</i> | <i>Brand</i> | <i>Cat. No.</i> |
| Vimentin                              | N/A                     | Primary                        | 1: 50           | Cell         | 5741            |
| Cytokeratin                           | N/A                     | Primary                        | 1: 50           | Abcam        | Ab93279         |
| Novolink Polymer<br>Detection Systems | HRP                     | Secondary (for<br>anti-rabbit) | 1:1             | Leica        | RE7140-K        |
| <b>Antibodies for IF study</b>        |                         |                                |                 |              |                 |
| <i>Marker</i>                         | <i>Conjugate</i>        | <i>Ab type</i>                 | <i>Dilution</i> | <i>Brand</i> | <i>Cat. No.</i> |
| PGP9.5                                | N/A                     | Primary                        | 1: 100          | Millipore    | AB1761-I        |
| CD31                                  | N/A                     | Primary                        | 1: 2000         | Novus        | NB100-1642      |
| Goat anti Rabbit<br>IgG               | Rodamine                | Secondary                      | 1: 1000         | ABgent       | ASR1424         |
| Goat anti Rat IgG                     | FITC                    | Secondary                      | 1: 500          | Arigo        | ARG23755        |

**Table S2.** Primer sequences for real-time qPCR study<sup>a</sup>

| <i>Gene</i>   | <i>Forward primer (5' to 3')</i> | <i>Reverse primer (5' to 3')</i> | <i>UPL probe<sup>b</sup></i> |
|---------------|----------------------------------|----------------------------------|------------------------------|
| COX-2         | GATGCTCTTCCGAGCTGTG              | GGATTGGAACAGCAAGGATTT            | 45                           |
| IL-6          | TCTAATTCATATCTTCAACCAAGAGG       | TGGTCCTTAGCCACTCCTTC             | 78                           |
| IL-1 $\beta$  | AGTTGACGGACCCCAAAG               | TTTGAAGCTGGATGCTCTCAT            | 26                           |
| TNF- $\alpha$ | CTGTAGCCCACGTCGTAGC              | TTTGAGATCCATGCCGTTG              | 25                           |

<sup>a</sup>Those primers were designed for mouse inflammatory cytokines.

<sup>b</sup>UPL: Universal Probe Library from Roche Applied Science (Penzberg, Germany)
